# Supplementary material for: Bryophytes can recognize their neighbours through volatile organic compounds
Source: PubMed Central journal article supplement (PMC7198583; doi:10.1038/s41598-020-64108-y), 2020-05-04
Supplement: 41598_2020_64108_MOESM1_ESM.pdf [file 41598_2020_64108_MOESM1_ESM.pdf]

# Bryophytes can recognize their neighbours through volatile organic compounds

Eliška Vicherová, Robert Glinwood, Tomáš Hájek, Petr Šmilauer and Velemir Ninkovic

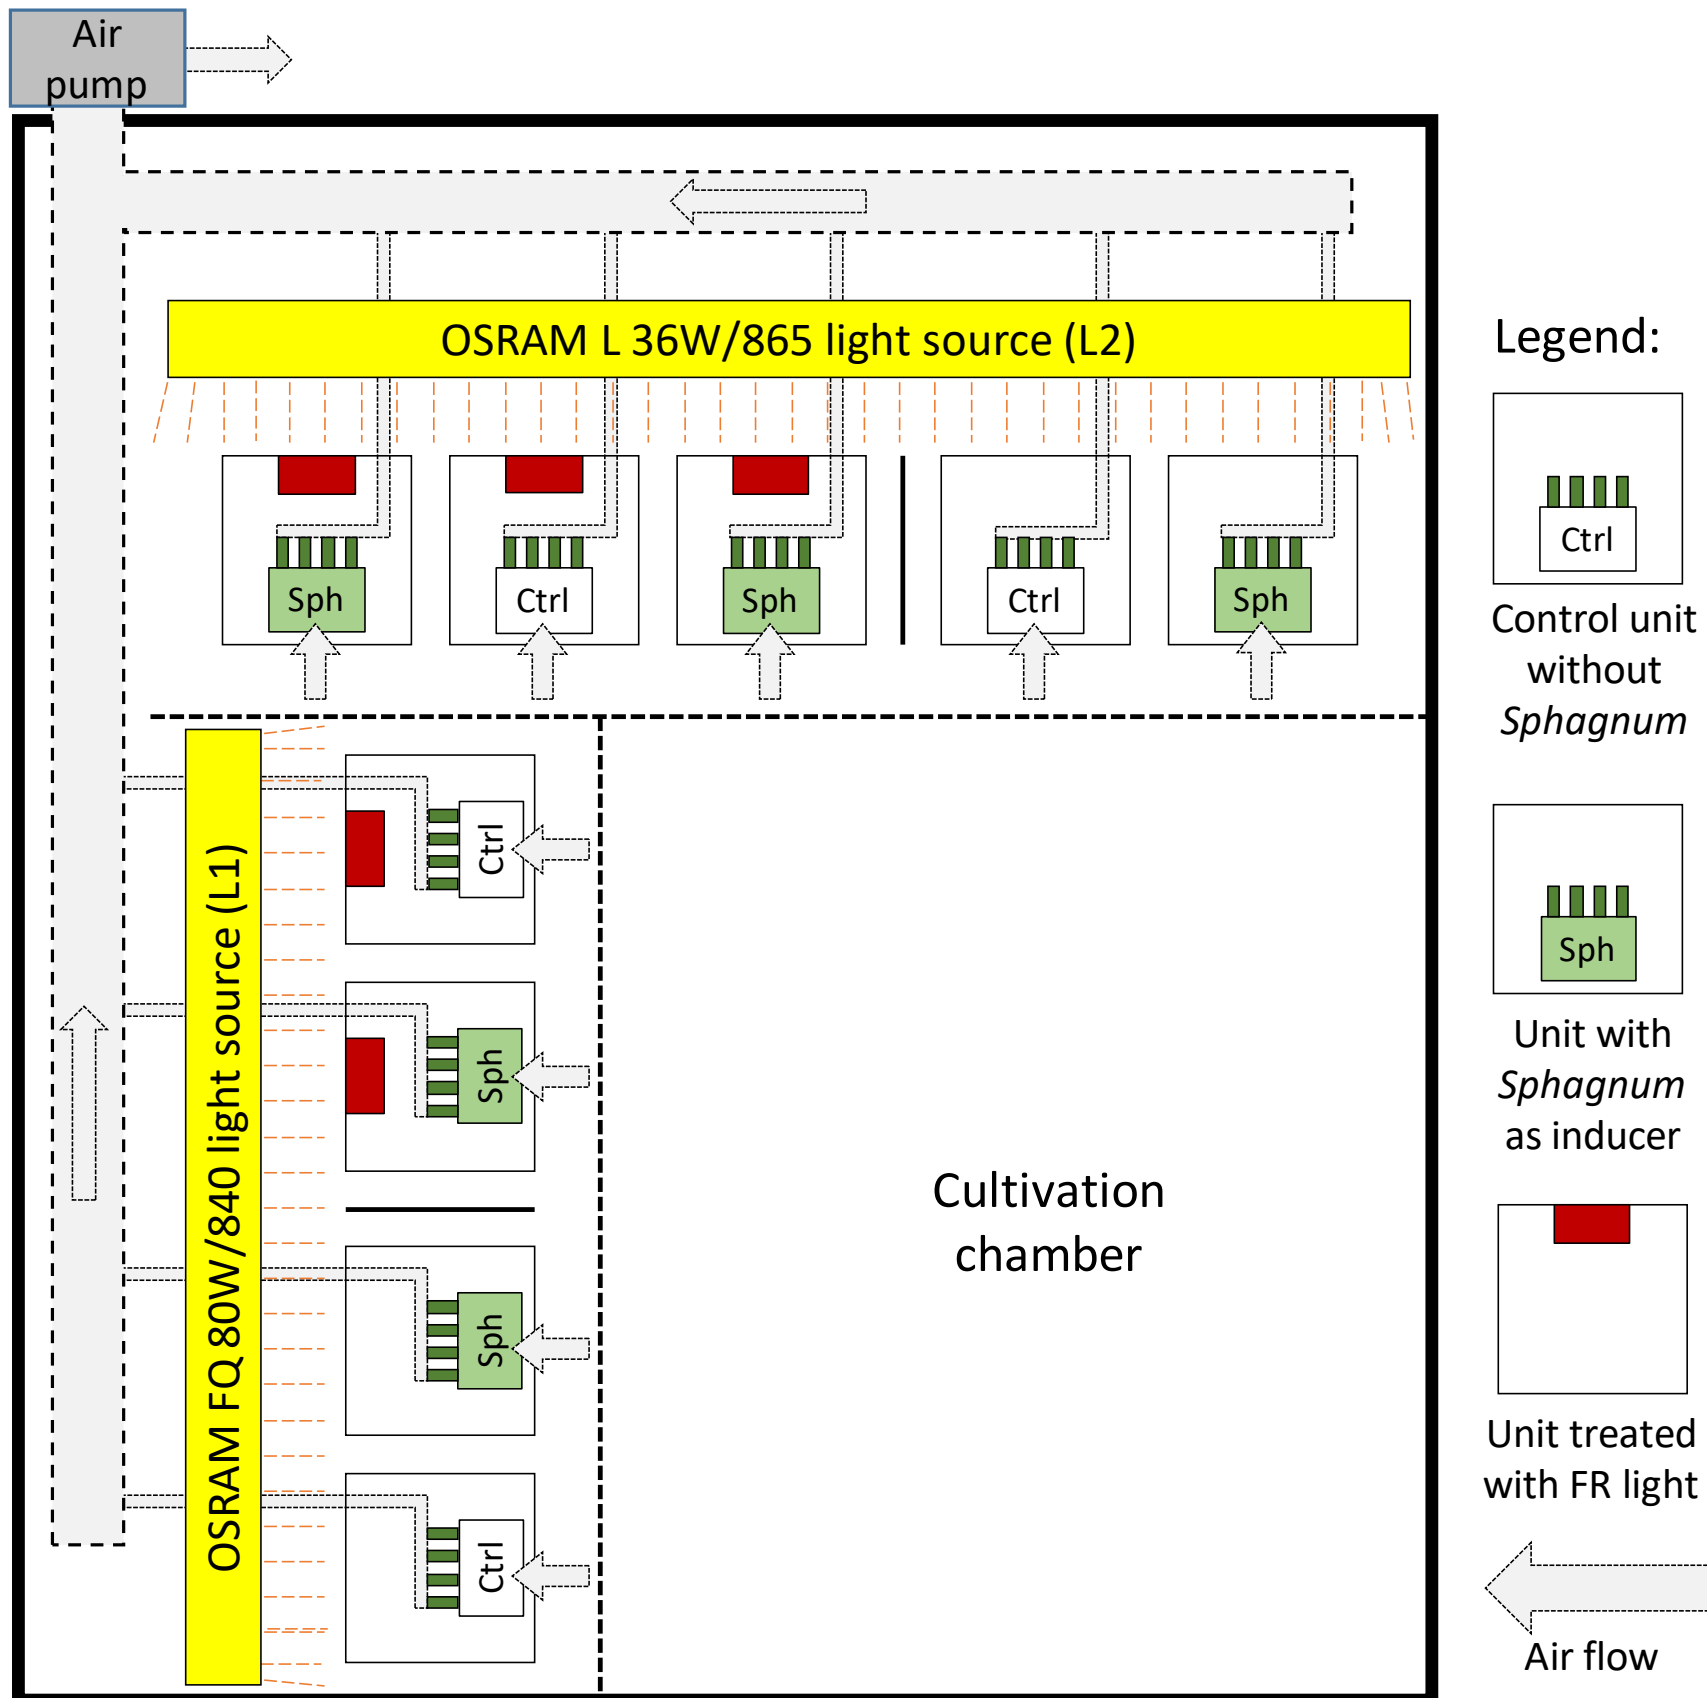

**Supplemental Figure S1.** The setup of cultivation units in the cultivation chamber during the experiment (the cultivation unit drafted in Fig.1). The units were illuminated by two sources of artificial daylight: Osram FQ 80W/840 (four units) and Osram L 36W/865 (five units). The FR light was added to five units; two were under Osram FQ 80W/840 (L1FR+ treatment), three under Osram L 36W/865 (L2FR+ treatment). Units with different light regimes were separated by non-transparent partitions. See Fig. S2 for spectral properties of the two light sources.
