# Supplementary material for: Bryophytes can recognize their neighbours through volatile organic compounds
Source: PubMed Central journal article supplement (PMC7198583; doi:10.1038/s41598-020-64108-y), 2020-05-04
Supplement: 41598_2020_64108_MOESM2_ESM.pdf [file 41598_2020_64108_MOESM2_ESM.pdf]

## Bryophytes can recognize their neighbours through volatile organic compounds

Eliška Vicherová, Robert Glinwood, Tomáš Hájek, Petr Šmilauer and Velemir Ninkovic

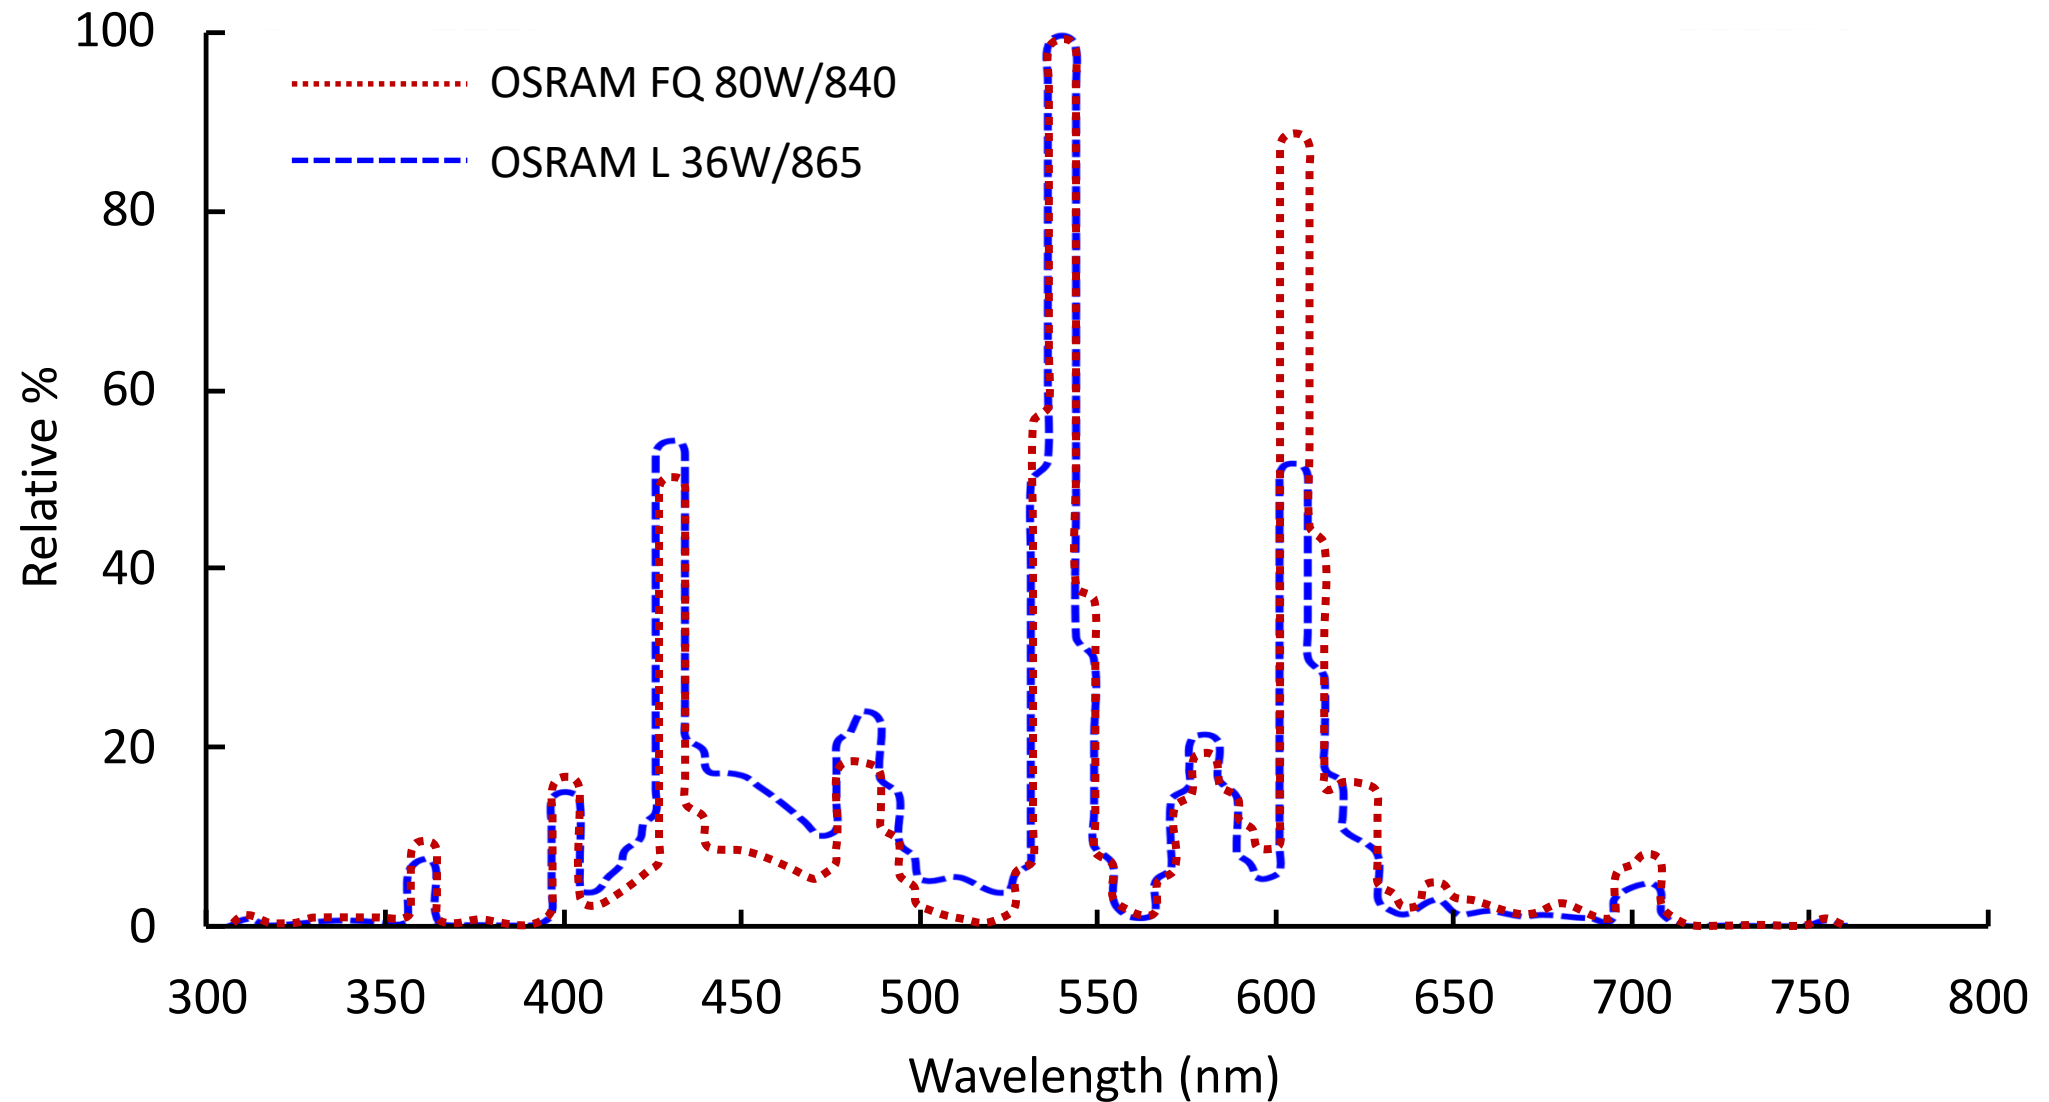

**Supplemental Figure S2.** Spectral power distribution diagram of two fluorescent Osram light sources used in the growth chamber. Redrawn from product datasheets (Osram GmbH, Germany).
