# Supplementary material for: Bryophytes can recognize their neighbours through volatile organic compounds
Source: PubMed Central journal article supplement (PMC7198583; doi:10.1038/s41598-020-64108-y), 2020-05-04
Supplement: 41598_2020_64108_MOESM4_ESM.pdf [file 41598_2020_64108_MOESM4_ESM.pdf]

## Bryophytes can recognize their neighbours through volatile organic compounds

Eliška Vicherová, Robert Glinwood, Tomáš Hájek, Petr Šmilauer and Velemir Ninkovic

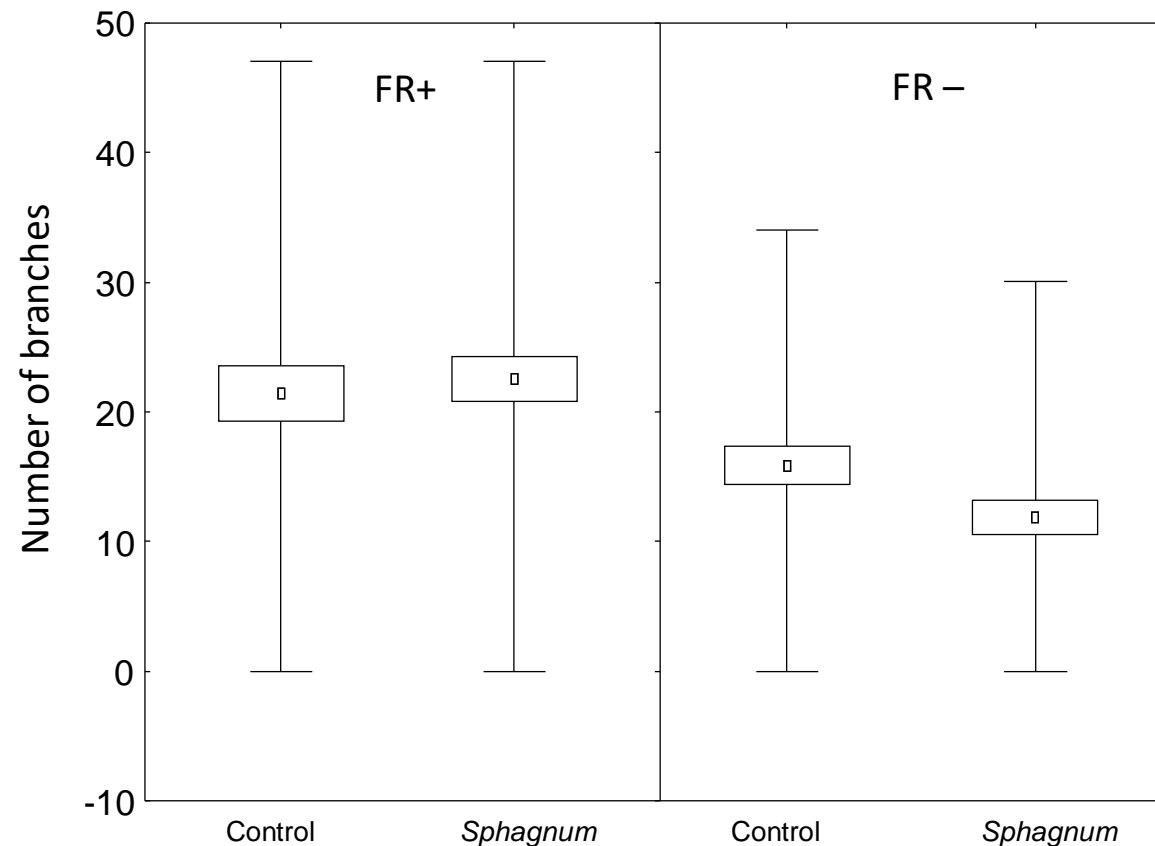

**Supplemental Figure S4.** The number of branches created by *H. vernicosus* shoots grown in cultivation units (Fig. 1) for 30 days under artificial light with and without FR light supplementation (FR+ and FR-). The shoots were exposed to VOCs produced by surrounding *H. vernicosus* individuals and to VOCs from *S. flexuosum* chamber (*Sphagnum*) or chamber without *S. flexuosum* (Control). The *S. flexuosum* VOCs had no effect on number of branches created by *H. vernicosus* under FR- ( $F_{1,2} = 1.5$ ,  $p = 0.34$ ) or FR+ ( $F_{1,3} = 0.06$ ,  $p = 0.82$ ). The box and whiskers depict  $\pm$  s.e. and minimum/maximum values.
