# Supplementary material for: Bryophytes can recognize their neighbours through volatile organic compounds
Source: PubMed Central journal article supplement (PMC7198583; doi:10.1038/s41598-020-64108-y), 2020-05-04
Supplement: 41598_2020_64108_MOESM5_ESM.pdf [file 41598_2020_64108_MOESM5_ESM.pdf]

## Bryophytes can recognize their neighbours through volatile organic compounds

Eliška Vicherová, Robert Glinwood, Tomáš Hájek, Petr Šmilauer and Velemir Ninkovic

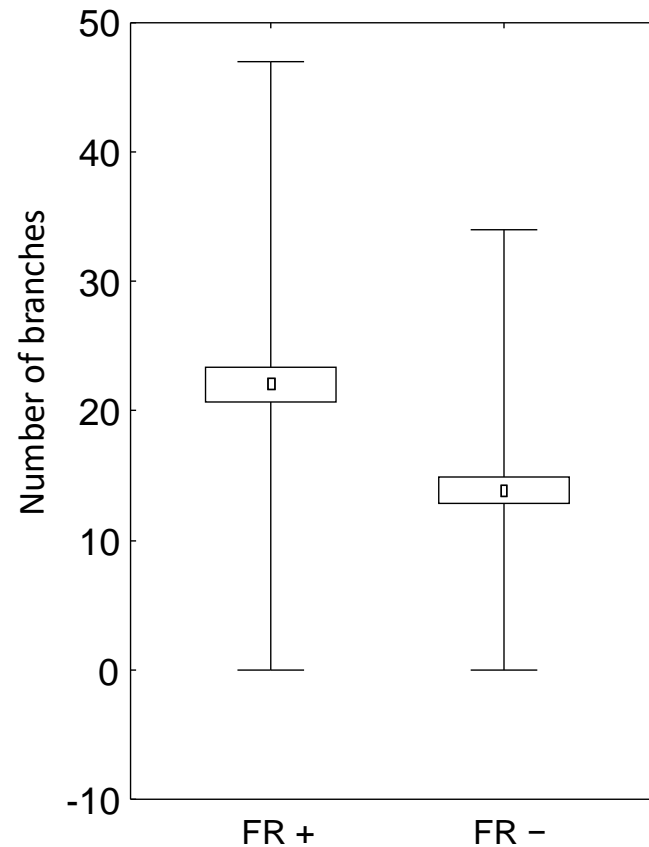

**Supplemental Figure S5.** The number of branches created by *H. vernicosus* shoots grown under artificial light with and without FR light supplementation (FR+ and FR-) in cultivation units (Fig. 1) for 30 days (FR+ includes L1 and L2 FR+, see methods for details). The shoots exposed and unexposed to *S. flexuosum* VOCs were pooled together for the statistical analysis. FR+ induced creation of more short branches ( $F_{1,7}=7.2$ ,  $p=0.03$ ). The box and whiskers depict  $\pm$  s.e. and minimum/maximum values.
