# Supplementary material for: Bryophytes can recognize their neighbours through volatile organic compounds
Source: PubMed Central journal article supplement (PMC7198583; doi:10.1038/s41598-020-64108-y), 2020-05-04
Supplement: 41598_2020_64108_MOESM7_ESM.pdf [file 41598_2020_64108_MOESM7_ESM.pdf]

## Bryophytes can recognize their neighbours through volatile organic compounds

Eliška Vicherová, Robert Glinwood, Tomáš Hájek, Petr Šmilauer and Velemir Ninkovic

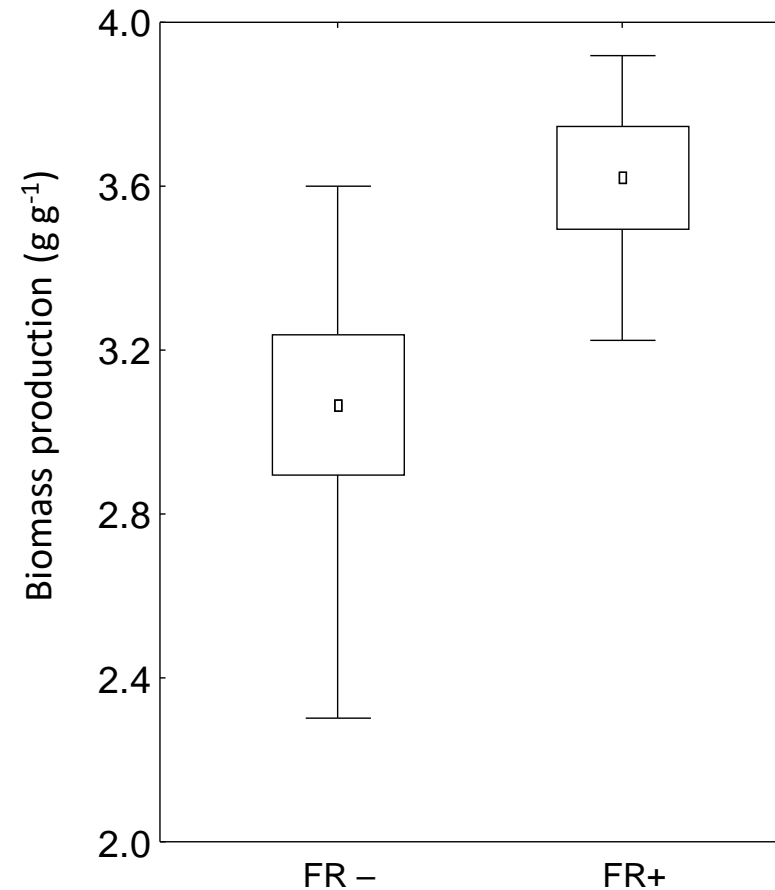

**Supplemental Figure S7.** The biomass production of *S. flexuosum* shoots grown in cultivation units (Fig. 1) for 30 days under artificial light without FR light addition (FR-) and added FR light (FR+; L1 and L2 FR+ treatments pooled together). The light treatment has no effect on biomass production of *S. flexuosum* ( $F_{1,4}=4.0$ ,  $p=0.12$ ; experimental design included in the test). The box and whiskers depict  $\pm$  s.e. and minimum/maximum values.
