# Supplementary material for: Bryophytes can recognize their neighbours through volatile organic compounds
Source: PubMed Central journal article supplement (PMC7198583; doi:10.1038/s41598-020-64108-y), 2020-05-04
Supplement: 41598_2020_64108_MOESM8_ESM.pdf [file 41598_2020_64108_MOESM8_ESM.pdf]

## Bryophytes can recognize their neighbours through volatile organic compounds

Eliška Vicherová, Robert Glinwood, Tomáš Hájek, Petr Šmilauer and Velemir Ninkovic

**Supplemental Table S1.** Detailed description of source localities for the mosses *Sphagnum flexuosum* and *Hamatocaulis vernicosus* used in the experiments.

| Locality name  | Mire type                  | Localization                            | GPS coordinates          | Altitude (m a.s.l.) | pH  | [Ca <sup>2+</sup> ] (mg L <sup>-1</sup> ) / $\kappa$ ( $\mu$ S cm <sup>-1</sup> ) | Sampled species                |
|----------------|----------------------------|-----------------------------------------|--------------------------|---------------------|-----|-----------------------------------------------------------------------------------|--------------------------------|
| Dlouhá louka   | moderately rich fen        | Plzeň region, Czech Republic            | 49°54'44"N<br>13°10'43"E | 570                 | 6.3 | 6.5/—                                                                             | <i>Sphagnum flexuosum</i>      |
| Hrádecká bahna | moderately rich fen        | Plzeň region, Czech Republic            | 49°42'47"N<br>13°39'31"E | 400                 | 7.0 | —/225                                                                             | <i>Sphagnum flexuosum</i>      |
| Řeka           | rich fen                   | Vysočina region, Czech Republic         | 49°39'59"N<br>15°51'11"E | 550                 | 7.2 | 50/—                                                                              | <i>Hamatocaulis vernicosus</i> |
| Bouškův mlýn   | moderately rich fen meadow | České Budějovice region, Czech Republic | 48°52'59"N<br>14°40'58"E | 450                 | 6.5 | —/159                                                                             | <i>Hamatocaulis vernicosus</i> |
