# Supplementary material for: Bryophytes can recognize their neighbours through volatile organic compounds
Source: PubMed Central journal article supplement (PMC7198583; doi:10.1038/s41598-020-64108-y), 2020-05-04
Supplement: 41598_2020_64108_MOESM9_ESM.pdf [file 41598_2020_64108_MOESM9_ESM.pdf]

## Bryophytes can recognize their neighbours through volatile organic compounds

Eliška Vicherová, Robert Glinwood, Tomáš Hájek, Petr Šmilauer and Velemir Ninkovic

**Supplemental Table S2.** Volatile organic compounds ( $\text{ng g}^{-1}$ ) produced by *Hamatocaulis vernicosus* carpets, exposed to *S. flexuosum* VOC (*Sphagnum*) or empty chamber (*control*), that were cultivated under standard light condition (FR–) or of added FR light (FR+). The *H. vernicosus* shoots were exposed either to VOCs released from neighbouring *H. vernicosus* individuals or to *H. vernicosus* VOCs and VOCs coming from *S. flexuosum* carpets. For more detail see methods.

| Light | Control /<br><i>Sphagnum</i><br>exposure | Total      | $\beta$ -cyclocitral | Methyl 2,6,6-                                 | Unknown 1   | Unknown 2   | Unknown 3   | $\alpha$ -copaene | Unknown 4   | Unknown 5   | (Z)- $\beta$ - | (E)- $\beta$ - | Unknown 6    | Unknown 7   |
|-------|------------------------------------------|------------|----------------------|-----------------------------------------------|-------------|-------------|-------------|-------------------|-------------|-------------|----------------|----------------|--------------|-------------|
|       |                                          |            |                      | trimethyl-1-<br>cyclohexene-1-<br>carboxylate |             |             |             |                   |             |             | farnesene      | farnesene      |              |             |
| FR+   | control                                  | <b>121</b> | 11.55                | 0.58                                          | 0.19        | 0.36        | 0.24        | 1.12              | 1.19        | 0.46        | 0.15           | 0.18           | 5.83         | 0.60        |
| FR+   | control                                  | <b>130</b> | 6.58                 | 1.29                                          | 0.13        | 0.31        | 0.28        | 1.27              | 0.76        | 0.84        | 0.26           | 0.33           | 6.88         | 0.76        |
| FR+   | control                                  | <b>392</b> | 48.11                | 2.95                                          | 0.80        | 1.07        | 0.96        | 1.35              | 1.12        | 1.31        | 0.77           | 1.46           | 28.81        | 2.54        |
| FR+   | control                                  | <b>257</b> | 25.03                | 2.28                                          | 0.25        | 0.48        | 0.33        | 1.13              | 1.13        | 0.45        | 0.27           | 1.35           | 8.70         | 1.03        |
|       | <b>mean</b>                              | <b>225</b> | <b>22.82</b>         | <b>1.78</b>                                   | <b>0.34</b> | <b>0.55</b> | <b>0.45</b> | <b>1.22</b>       | <b>1.05</b> | <b>0.77</b> | <b>0.36</b>    | <b>0.83</b>    | <b>12.56</b> | <b>1.23</b> |
| FR–   | control                                  | <b>135</b> | 6.35                 | 0.09                                          | 0.06        | 0.11        | 0.34        | 1.21              | 0.34        | 0.72        | 0.28           | 0.12           | 0.22         | 0.48        |
| FR–   | control                                  | <b>185</b> | 9.18                 | 0.08                                          | 0.25        | 0.38        | 0.28        | 1.41              | 1.27        | 0.74        | 0.35           | 0.49           | 8.16         | 0.81        |
| FR–   | control                                  | <b>99</b>  | 5.56                 | 0.22                                          | 0.10        | 0.20        | 0.10        | 0.61              | 0.28        | 0.57        | 0.17           | 0.19           | 3.57         | 0.42        |
| FR–   | control                                  | <b>198</b> | 7.85                 | 0.30                                          | 0.18        | 0.54        | 0.43        | 1.96              | 0.85        | 0.49        | 0.54           | 0.80           | 9.58         | 1.03        |
|       | <b>mean</b>                              | <b>168</b> | <b>7.23</b>          | <b>0.17</b>                                   | <b>0.15</b> | <b>0.31</b> | <b>0.29</b> | <b>1.30</b>       | <b>0.68</b> | <b>0.63</b> | <b>0.33</b>    | <b>0.40</b>    | <b>5.38</b>  | <b>0.69</b> |
| FR+   | <i>Sphagnum</i>                          | <b>216</b> | 18.56                | 2.00                                          | 0.20        | 0.43        | 0.41        | 1.65              | 1.10        | 0.59        | 0.32           | 0.72           | 9.51         | 0.72        |
| FR+   | <i>Sphagnum</i>                          | <b>497</b> | 20.49                | 1.36                                          | 0.55        | 1.04        | 0.85        | 5.07              | 2.01        | 0.82        | 0.73           | 1.80           | 32.08        | 2.39        |
| FR+   | <i>Sphagnum</i>                          | <b>146</b> | 21.69                | 3.15                                          | 0.10        | 0.26        | 0.60        | 0.48              | 0.29        | 0.40        | 0.16           | 0.72           | 2.91         | 0.66        |
| FR+   | <i>Sphagnum</i>                          | <b>170</b> | 13.36                | 4.90                                          | 0.51        | 1.30        | 0.40        | 1.32              | 7.14        | 0.55        | 0.47           | 0.86           | 5.71         | 1.23        |
| FR+   | <i>Sphagnum</i>                          | <b>242</b> | 22.66                | 1.77                                          | 0.28        | 0.54        | 0.51        | 2.17              | 1.24        | 0.36        | 0.35           | 1.50           | 11.19        | 0.94        |
| FR+   | <i>Sphagnum</i>                          | <b>380</b> | 9.77                 | 1.23                                          | 0.37        | 0.86        | 0.82        | 3.91              | 2.02        | 1.07        | 0.63           | 1.44           | 22.84        | 2.02        |
|       | <b>mean</b>                              | <b>275</b> | <b>17.76</b>         | <b>2.40</b>                                   | <b>0.34</b> | <b>0.74</b> | <b>0.60</b> | <b>2.43</b>       | <b>2.30</b> | <b>0.63</b> | <b>0.44</b>    | <b>1.17</b>    | <b>14.04</b> | <b>1.33</b> |
| FR–   | <i>Sphagnum</i>                          | <b>150</b> | 6.97                 | 0.71                                          | 0.21        | 0.27        | 0.24        | 1.01              | 0.68        | 0.85        | 0.28           | 0.32           | 5.75         | 0.75        |
| FR–   | <i>Sphagnum</i>                          | <b>548</b> | 18.82                | 1.55                                          | 0.63        | 1.17        | 1.00        | 4.87              | 3.12        | 1.54        | 0.92           | 2.07           | 29.64        | 2.12        |
| FR–   | <i>Sphagnum</i>                          | <b>150</b> | 6.97                 | 0.71                                          | 0.21        | 0.27        | 0.24        | 1.01              | 0.68        | 0.85        | 0.28           | 0.32           | 5.75         | 0.75        |
| FR–   | <i>Sphagnum</i>                          | <b>256</b> | 12.95                | 0.50                                          | 0.32        | 0.60        | 0.44        | 2.46              | 1.14        | 0.59        | 0.39           | 1.34           | 14.13        | 1.03        |
|       | <b>mean</b>                              | <b>276</b> | <b>11.43</b>         | <b>0.87</b>                                   | <b>0.34</b> | <b>0.58</b> | <b>0.48</b> | <b>2.34</b>       | <b>1.40</b> | <b>0.96</b> | <b>0.47</b>    | <b>1.01</b>    | <b>13.82</b> | <b>1.16</b> |

Table S2 (continued).

| <b>Control /<br/><i>Sphagnum</i></b> |                 | Unknown 8   | Unknown 9    | Unknown 10   | Unknown 11   | Unknown 12  | Unknown 13  | Unknown 14  | Unknown 15   | Unknown 16  | Rimuene      | Unknown 17   | Unknown 18  |
|--------------------------------------|-----------------|-------------|--------------|--------------|--------------|-------------|-------------|-------------|--------------|-------------|--------------|--------------|-------------|
| <b>Light exposure</b>                |                 |             |              |              |              |             |             |             |              |             |              |              |             |
| <b>FR+</b>                           | control         | 0.95        | 5.04         | 16.61        | 5.50         | 1.48        | 2.87        | 1.19        | 11.11        | 0.43        | 11.60        | 41.48        | 0.70        |
| <b>FR+</b>                           | control         | 1.39        | 9.39         | 11.62        | 13.06        | 1.83        | 3.84        | 0.74        | 8.22         | 0.81        | 49.13        | 9.33         | 0.87        |
| <b>FR+</b>                           | control         | 6.31        | 37.57        | 67.55        | 27.26        | 6.93        | 14.53       | 5.66        | 27.98        | 6.84        | 97.72        | 1.82         | 0.93        |
| <b>FR+</b>                           | control         | 2.82        | 18.57        | 31.78        | 12.36        | 5.03        | 9.85        | 3.99        | 25.11        | 0.85        | 69.11        | 33.56        | 1.80        |
| <b>mean</b>                          |                 | <b>2.87</b> | <b>17.64</b> | <b>31.89</b> | <b>14.55</b> | <b>3.82</b> | <b>7.77</b> | <b>2.89</b> | <b>18.10</b> | <b>2.23</b> | <b>56.89</b> | <b>21.55</b> | <b>1.08</b> |
| <b>FR-</b>                           | control         | 0.22        | 1.32         | 1.15         | 0.44         | 0.50        | 0.23        | 0.26        | 2.24         | 0.89        | 16.47        | 99.61        | 1.40        |
| <b>FR-</b>                           | control         | 1.88        | 8.42         | 28.36        | 14.12        | 3.40        | 6.82        | 3.46        | 18.96        | 1.01        | 46.31        | 27.79        | 0.74        |
| <b>FR-</b>                           | control         | 0.61        | 4.73         | 7.92         | 6.41         | 1.62        | 2.71        | 1.18        | 4.69         | 0.49        | 48.10        | 8.02         | 0.88        |
| <b>FR-</b>                           | control         | 2.40        | 7.60         | 24.38        | 15.74        | 4.71        | 7.98        | 2.84        | 14.43        | 2.53        | 56.32        | 33.36        | 0.77        |
| <b>mean</b>                          |                 | <b>1.28</b> | <b>5.52</b>  | <b>15.45</b> | <b>9.18</b>  | <b>2.56</b> | <b>4.43</b> | <b>1.94</b> | <b>10.08</b> | <b>1.23</b> | <b>41.80</b> | <b>42.19</b> | <b>0.95</b> |
| <b>FR+</b>                           | <i>Sphagnum</i> | 2.03        | 11.43        | 23.73        | 12.33        | 2.67        | 6.00        | 2.83        | 19.64        | 0.91        | 68.26        | 28.53        | 1.21        |
| <b>FR+</b>                           | <i>Sphagnum</i> | 7.29        | 47.06        | 79.95        | 73.30        | 7.04        | 14.70       | 6.39        | 55.79        | 3.43        | 51.16        | 81.22        | 0.86        |
| <b>FR+</b>                           | <i>Sphagnum</i> | 0.59        | 8.27         | 9.08         | 1.46         | 0.56        | 0.50        | 1.14        | 9.46         | 0.49        | 76.32        | 5.14         | 1.72        |
| <b>FR+</b>                           | <i>Sphagnum</i> | 1.42        | 11.99        | 4.59         | 14.26        | 1.68        | 4.37        | 0.81        | 5.14         | 4.35        | 79.92        | 1.04         | 2.58        |
| <b>FR+</b>                           | <i>Sphagnum</i> | 3.17        | 23.47        | 31.23        | 21.16        | 3.90        | 6.62        | 2.62        | 25.46        | 1.49        | 50.09        | 28.79        | 0.93        |
| <b>FR+</b>                           | <i>Sphagnum</i> | 5.22        | 31.47        | 57.51        | 39.46        | 7.88        | 15.08       | 4.16        | 47.97        | 3.15        | 18.92        | 101.04       | 1.30        |
| <b>mean</b>                          |                 | <b>3.29</b> | <b>22.28</b> | <b>34.35</b> | <b>26.99</b> | <b>3.95</b> | <b>7.88</b> | <b>2.99</b> | <b>27.25</b> | <b>2.30</b> | <b>57.45</b> | <b>40.96</b> | <b>1.43</b> |
| <b>FR-</b>                           | <i>Sphagnum</i> | 1.59        | 7.76         | 14.42        | 8.79         | 2.24        | 4.27        | 1.40        | 12.39        | 0.84        | 56.20        | 20.99        | 1.15        |
| <b>FR-</b>                           | <i>Sphagnum</i> | 7.15        | 30.70        | 60.84        | 47.71        | 7.57        | 15.59       | 5.96        | 38.32        | 4.40        | 188.85       | 69.96        | 3.99        |
| <b>FR-</b>                           | <i>Sphagnum</i> | 1.59        | 7.76         | 14.42        | 8.79         | 2.24        | 4.27        | 1.40        | 12.39        | 0.84        | 56.20        | 20.99        | 1.15        |
| <b>FR-</b>                           | <i>Sphagnum</i> | 3.97        | 20.18        | 39.79        | 18.81        | 4.90        | 10.35       | 3.72        | 33.32        | 1.68        | 45.91        | 36.39        | 1.38        |
| <b>mean</b>                          |                 | <b>3.58</b> | <b>16.60</b> | <b>32.37</b> | <b>21.02</b> | <b>4.24</b> | <b>8.62</b> | <b>3.12</b> | <b>24.11</b> | <b>1.94</b> | <b>86.79</b> | <b>37.08</b> | <b>1.92</b> |
