# Supplementary material for: Bryophytes can recognize their neighbours through volatile organic compounds
Source: PubMed Central journal article supplement (PMC7198583; doi:10.1038/s41598-020-64108-y), 2020-05-04
Supplement: 41598_2020_64108_MOESM10_ESM.pdf [file 41598_2020_64108_MOESM10_ESM.pdf]

## Bryophytes can recognize their neighbours through volatile organic compounds

Eliška Vicherová, Robert Glinwood, Tomáš Hájek, Petr Šmilauer and Velemir Ninkovic

**Supplemental Table S3.** Volatile organic compounds ( $\text{ng g}^{-1}$ ) produced by *Sphagnum flexuosum* carpets, cultivated under standard light condition (FR–) of added FR light (FR+). The VOCs sampling was done either under standard light condition (SS) or the FR light was added to shoots exposed to FR light during cultivation (FRS).

| Sampling    | Light | Total      | $\alpha$ -pinene | $\beta$ -myrcene | (E)-ocimene | $\beta$ -cyclocitral | Methyl 2,6,6-trimethyl-1-cyclohexene-1-carboxylate | (+)-cyclosativene | $\alpha$ -copaene | Unknown 4   | ( $\pm$ )-geosmin | (+)-sativene | Unknown 19  | Unknown 20  | Unknown 21  | Unknown 22  | Unknown 23   |
|-------------|-------|------------|------------------|------------------|-------------|----------------------|----------------------------------------------------|-------------------|-------------------|-------------|-------------------|--------------|-------------|-------------|-------------|-------------|--------------|
| SS          | FR–   | <b>121</b> | 0.33             | 0.41             | 3.28        | 2.02                 | 0.67                                               | 0.90              | 0.98              | 0.29        | 0.89              | 1.94         | 0.44        | 13.22       | 3.19        | 10.14       | 2.43         |
| SS          | FR–   | <b>40</b>  | 0.63             | 0.32             | 0.60        | 1.06                 | 0.20                                               | 0.23              | 0.48              | 0.32        | 0.20              | 0.61         | 0.13        | 3.68        | 0.63        | 2.30        | 0.57         |
| SS          | FR–   | <b>13</b>  | 0.02             | 0.11             | 0.45        | 0.31                 | 0.08                                               | 0.01              | 0.03              | 0.03        | 0.04              | 0.06         | 0.02        | 1.39        | 0.18        | 0.11        | 0.07         |
| SS          | FR–   | <b>25</b>  | 0.04             | 0.20             | 0.69        | 0.55                 | 0.14                                               | 0.07              | 0.09              | 0.08        | 0.08              | 0.17         | 0.04        | 2.31        | 0.70        | 0.15        | 0.51         |
| <b>mean</b> |       | <b>50</b>  | <b>0.25</b>      | <b>0.26</b>      | <b>1.26</b> | <b>0.99</b>          | <b>0.27</b>                                        | <b>0.30</b>       | <b>0.39</b>       | <b>0.18</b> | <b>0.30</b>       | <b>0.69</b>  | <b>0.16</b> | <b>5.15</b> | <b>1.18</b> | <b>3.17</b> | <b>0.90</b>  |
| SS          | FR+   | <b>59</b>  | 0.03             | 0.29             | 1.27        | 5.94                 | 2.03                                               | 0.02              | 0.18              | 0.16        | 0.10              | 0.04         | 0.13        | 4.49        | 1.29        | 0.19        | 4.19         |
| SS          | FR+   | <b>70</b>  | 0.07             | 0.33             | 2.18        | 7.28                 | 3.93                                               | 0.08              | 0.28              | 0.07        | 0.11              | 0.16         | 0.19        | 5.14        | 1.31        | 0.44        | 3.60         |
| SS          | FR+   | <b>76</b>  | 0.06             | 0.21             | 0.93        | 4.79                 | 2.77                                               | 0.10              | 0.30              | 0.08        | 0.23              | 0.28         | 0.20        | 7.05        | 1.66        | 0.41        | 2.89         |
| SS          | FR+   | <b>85</b>  | 0.11             | 0.44             | 2.46        | 4.53                 | 2.65                                               | 0.40              | 0.43              | 0.06        | 0.31              | 0.75         | 0.23        | 9.10        | 1.93        | 1.92        | 1.01         |
| SS          | FR+   | <b>103</b> | 0.05             | 0.28             | 1.30        | 5.64                 | 3.00                                               | 0.23              | 0.32              | 0.12        | 0.27              | 0.59         | 0.36        | 8.34        | 1.72        | 2.31        | 2.42         |
| SS          | FR+   | <b>83</b>  | 0.08             | 0.37             | 2.70        | 5.14                 | 2.72                                               | 0.19              | 0.19              | 0.12        | 0.27              | 0.38         | 0.29        | 8.08        | 2.04        | 1.76        | 1.78         |
| <b>mean</b> |       | <b>79</b>  | <b>0.07</b>      | <b>0.32</b>      | <b>1.81</b> | <b>5.55</b>          | <b>2.85</b>                                        | <b>0.17</b>       | <b>0.28</b>       | <b>0.10</b> | <b>0.21</b>       | <b>0.37</b>  | <b>0.23</b> | <b>7.03</b> | <b>1.66</b> | <b>1.17</b> | <b>2.65</b>  |
| FRS         | FR–   | <b>85</b>  | 0.58             | 1.42             | 14.94       | 1.14                 | 0.51                                               | 1.46              | 1.02              | 0.38        | 0.81              | 3.00         | 0.71        | 10.26       | 3.46        | 6.30        | 5.53         |
| FRS         | FR–   | <b>51</b>  | 0.03             | 0.10             | 0.50        | 0.52                 | 0.14                                               | 0.78              | 1.70              | 0.46        | 0.33              | 1.73         | 0.30        | 3.01        | 1.96        | 9.29        | 3.18         |
| FRS         | FR–   | <b>30</b>  | 0.08             | 0.57             | 2.41        | 0.47                 | 0.22                                               | 0.34              | 0.06              | 0.08        | 0.21              | 0.78         | 0.15        | 2.71        | 0.57        | 1.26        | 0.72         |
| FRS         | FR–   | <b>27</b>  | 0.03             | 0.21             | 1.06        | 1.11                 | 0.37                                               | 0.11              | 0.10              | 0.12        | 0.08              | 0.28         | 0.10        | 2.10        | 0.56        | 0.69        | 2.39         |
| <b>mean</b> |       | <b>48</b>  | <b>0.18</b>      | <b>0.57</b>      | <b>4.72</b> | <b>0.81</b>          | <b>0.31</b>                                        | <b>0.67</b>       | <b>0.72</b>       | <b>0.26</b> | <b>0.35</b>       | <b>1.45</b>  | <b>0.32</b> | <b>4.52</b> | <b>1.64</b> | <b>4.38</b> | <b>2.96</b>  |
| FRS         | FR+   | <b>60</b>  | 0.09             | 0.58             | 3.19        | 3.35                 | 2.21                                               | 0.09              | 0.30              | 0.08        | 0.10              | 0.27         | 0.31        | 4.18        | 1.14        | 0.68        | 8.20         |
| FRS         | FR+   | <b>95</b>  | 0.16             | 0.87             | 2.75        | 8.87                 | 5.76                                               | 0.23              | 0.60              | 0.13        | 0.14              | 0.17         | 0.46        | 5.73        | 1.29        | 0.47        | 2.64         |
| FRS         | FR+   | <b>68</b>  | 0.10             | 0.55             | 2.68        | 3.49                 | 2.70                                               | 0.18              | 0.26              | 0.08        | 0.15              | 0.41         | 0.25        | 5.32        | 1.00        | 1.12        | 6.02         |
| FRS         | FR+   | <b>100</b> | 0.08             | 0.66             | 3.55        | 4.41                 | 1.97                                               | 0.10              | 0.46              | 0.16        | 0.10              | 0.19         | 0.15        | 3.89        | 1.48        | 0.50        | 32.80        |
| FRS         | FR+   | <b>86</b>  | 0.09             | 0.65             | 3.50        | 4.32                 | 2.46                                               | 0.12              | 0.38              | 0.08        | 0.13              | 0.15         | 0.27        | 3.88        | 1.62        | 0.44        | 26.86        |
| FRS         | FR+   | <b>47</b>  | 0.02             | 0.17             | 1.01        | 2.71                 | 1.05                                               | 0.04              | 0.22              | 0.14        | 0.16              | 0.09         | 0.15        | 1.63        | 0.63        | 0.21        | 15.88        |
| <b>mean</b> |       | <b>76</b>  | <b>0.09</b>      | <b>0.58</b>      | <b>2.78</b> | <b>4.52</b>          | <b>2.69</b>                                        | <b>0.13</b>       | <b>0.37</b>       | <b>0.11</b> | <b>0.13</b>       | <b>0.21</b>  | <b>0.26</b> | <b>4.11</b> | <b>1.19</b> | <b>0.57</b> | <b>15.40</b> |

Supplemental Table S3 (continued).

|             |       | (-)-             |             |             |             |             |             |             |             |             |             |             |              |              |             |         |
|-------------|-------|------------------|-------------|-------------|-------------|-------------|-------------|-------------|-------------|-------------|-------------|-------------|--------------|--------------|-------------|---------|
|             |       | Unknown calamene |             |             |             | Unknown     |             |             |             | Unknown     |             |             |              | Manoyl oxide |             | Unknown |
| Sampling    | Light | 24               | 25          | 26          | 27          | 28          | 29          | 30          | 31          | 32          | 33          | 34          | oxide        | 35           |             |         |
| SS          | FR-   | 2.89             | 0.92        | 0.96        | 11.33       | 0.76        | 0.12        | 0.35        | 0.66        | 5.25        | 5.18        | 2.10        | 39.64        | 5.17         | 4.93        |         |
| SS          | FR-   | 1.24             | 0.30        | 0.58        | 3.55        | 0.24        | 0.07        | 0.19        | 0.24        | 4.37        | 2.01        | 0.15        | 11.08        | 1.95         | 2.29        |         |
| SS          | FR-   | 0.36             | 0.04        | 0.06        | 1.53        | 0.09        | 0.02        | 0.07        | 0.11        | 0.99        | 0.68        | 0.08        | 3.82         | 0.71         | 1.05        |         |
| SS          | FR-   | 0.29             | 0.14        | 0.07        | 2.82        | 0.15        | 0.10        | 0.16        | 0.33        | 1.29        | 1.24        | 0.43        | 9.09         | 1.49         | 2.03        |         |
| <b>mean</b> |       | <b>1.19</b>      | <b>0.35</b> | <b>0.42</b> | <b>4.81</b> | <b>0.31</b> | <b>0.08</b> | <b>0.19</b> | <b>0.33</b> | <b>2.97</b> | <b>2.28</b> | <b>0.69</b> | <b>15.91</b> | <b>2.33</b>  | <b>2.58</b> |         |
| SS          | FR+   | 1.03             | 0.09        | 0.22        | 4.28        | 0.40        | 0.43        | 1.04        | 1.80        | 5.46        | 1.73        | 0.74        | 16.01        | 2.28         | 3.50        |         |
| SS          | FR+   | 1.32             | 0.10        | 0.21        | 4.29        | 0.30        | 0.73        | 1.68        | 2.47        | 6.18        | 2.18        | 1.57        | 18.02        | 2.50         | 2.98        |         |
| SS          | FR+   | 1.68             | 0.09        | 0.22        | 5.22        | 0.39        | 0.54        | 1.32        | 1.94        | 6.20        | 2.64        | 2.38        | 25.11        | 2.78         | 3.51        |         |
| SS          | FR+   | 2.00             | 0.44        | 0.31        | 6.36        | 0.29        | 0.44        | 0.90        | 1.34        | 6.65        | 2.94        | 0.81        | 29.62        | 3.47         | 3.42        |         |
| SS          | FR+   | 1.63             | 0.26        | 0.29        | 6.70        | 0.17        | 0.42        | 0.87        | 1.53        | 15.00       | 3.19        | 2.25        | 33.87        | 3.44         | 5.98        |         |
| SS          | FR+   | 1.56             | 0.27        | 0.37        | 6.06        | 0.02        | 0.26        | 0.61        | 0.99        | 9.51        | 2.64        | 0.27        | 26.76        | 3.18         | 3.96        |         |
| <b>mean</b> |       | <b>1.54</b>      | <b>0.21</b> | <b>0.27</b> | <b>5.48</b> | <b>0.26</b> | <b>0.47</b> | <b>1.07</b> | <b>1.68</b> | <b>8.17</b> | <b>2.55</b> | <b>1.34</b> | <b>24.90</b> | <b>2.94</b>  | <b>3.89</b> |         |
| FRS         | FR-   | 3.04             | 0.70        | 0.90        | 6.57        | 0.15        | 0.27        | 0.21        | 0.91        | 2.35        | 4.68        | 0.74        | 4.15         | 5.04         | 3.27        |         |
| FRS         | FR-   | 0.95             | 1.93        | 0.46        | 2.33        | 0.10        | 0.37        | 0.09        | 0.48        | 2.66        | 1.42        | 0.58        | 12.53        | 1.47         | 1.98        |         |
| FRS         | FR-   | 0.75             | 0.14        | 0.10        | 2.23        | 0.16        | 0.03        | 0.12        | 0.44        | 1.04        | 1.58        | 0.10        | 10.12        | 1.67         | 1.09        |         |
| FRS         | FR-   | 0.61             | 0.11        | 0.14        | 1.70        | 0.04        | 0.04        | 0.27        | 0.26        | 0.85        | 1.15        | 0.65        | 9.57         | 1.23         | 1.40        |         |
| <b>mean</b> |       | <b>1.34</b>      | <b>0.72</b> | <b>0.40</b> | <b>3.21</b> | <b>0.11</b> | <b>0.18</b> | <b>0.17</b> | <b>0.52</b> | <b>1.72</b> | <b>2.21</b> | <b>0.51</b> | <b>9.09</b>  | <b>2.35</b>  | <b>1.94</b> |         |
| FRS         | FR+   | 0.94             | 0.13        | 0.25        | 3.10        | 0.41        | 0.75        | 1.41        | 3.07        | 4.94        | 2.21        | 4.04        | 10.16        | 1.91         | 2.14        |         |
| FRS         | FR+   | 1.54             | 0.16        | 0.36        | 6.15        | 0.79        | 3.20        | 5.90        | 11.64       | 7.70        | 3.31        | 1.59        | 15.18        | 3.60         | 3.37        |         |
| FRS         | FR+   | 1.19             | 0.23        | 0.27        | 3.40        | 0.83        | 0.89        | 1.57        | 2.87        | 6.43        | 2.21        | 6.38        | 12.82        | 1.98         | 2.82        |         |
| FRS         | FR+   | 1.01             | 0.11        | 0.39        | 2.25        | 1.21        | 2.11        | 2.69        | 6.00        | 4.08        | 2.12        | 11.63       | 11.89        | 1.89         | 2.05        |         |
| FRS         | FR+   | 1.02             | 0.08        | 0.49        | 2.12        | 1.14        | 1.47        | 3.19        | 5.46        | 3.72        | 2.30        | 5.26        | 11.38        | 1.57         | 2.20        |         |
| FRS         | FR+   | 0.50             | 0.23        | 0.06        | 0.95        | 1.05        | 1.08        | 1.63        | 3.67        | 2.01        | 0.88        | 3.81        | 5.03         | 0.78         | 1.10        |         |
| <b>mean</b> |       | <b>1.03</b>      | <b>0.16</b> | <b>0.30</b> | <b>2.99</b> | <b>0.91</b> | <b>1.58</b> | <b>2.73</b> | <b>5.45</b> | <b>4.81</b> | <b>2.17</b> | <b>5.45</b> | <b>11.08</b> | <b>1.95</b>  | <b>2.28</b> |         |
