# Supplementary material for: Bryophytes can recognize their neighbours through volatile organic compounds
Source: PubMed Central journal article supplement (PMC7198583; doi:10.1038/s41598-020-64108-y), 2020-05-04
Supplement: 41598_2020_64108_MOESM11_ESM.pdf [file 41598_2020_64108_MOESM11_ESM.pdf]

## Bryophytes can recognize their neighbours through volatile organic compounds

Eliška Vicherová, Robert Glinwood, Tomáš Hájek, Petr Šmilauer and Velemir Ninkovic

**Supplemental Table S4.** Volatile organic compounds collected from *Sphagnum flexuosum* and *Hamatocaulis vernicosus*. Tentative compound identification, retention time and retention index (Kovats index) on HP-1 column, mass spectral data (m/z and relative abundance).

| Tentative compound identification                         | Retention  |           | m/z fragments                                                                                          | Suggested chemical |                                                            |
|-----------------------------------------------------------|------------|-----------|--------------------------------------------------------------------------------------------------------|--------------------|------------------------------------------------------------|
|                                                           | time (min) | KI (HP-1) |                                                                                                        | class of unknown   | Occurs in species                                          |
| <b>β-cyclocitral</b>                                      | 11.84      | 1201      | 137 (100), 152 (86), 109 (74), 123 (74), 81 (58), 67 (56), 41 (39), 91 (34), 79 (31), 77 (27)          |                    | <i>Hamatocaulis vernicosus</i> , <i>Sphagnum flexuosum</i> |
| <b>Methyl 2,6,6-trimethyl-1-cyclohexene-1-carboxylate</b> | 12.10      | 1220      | 135 (100), 123 (52), 107 (51), 167 (36), 91 (23), 79 (22), 41 (18), 81 (16), 151 (16), 77 (15)         |                    | <i>Hamatocaulis vernicosus</i> , <i>Sphagnum flexuosum</i> |
| Unknown 1                                                 | 13.88      | 1354      | 105 (100), 119 (82), 161 (75), 91 (53), 93 (39), 121 (32), 120 (28), 81 (25), 41 (25), 133 (18), 204   | sesquiterpene      | <i>Hamatocaulis vernicosus</i>                             |
| Unknown 2                                                 | 13.94      | 1359      | 119 (100), 41 (59), 55 (48), 105 (44), 133 (39), 91 (35), 56 (30), 93 (25), 120 (23), 107 (23), 204    | sesquiterpene      | <i>Hamatocaulis vernicosus</i>                             |
| Unknown 3                                                 | 14.18      | 1377      | 105 (100), 119 (92), 93 (74), 120 (67), 161 (54), 91 (53), 49 (45), 41 (39), 92 (35), 121 (27), 204    | sesquiterpene      | <i>Hamatocaulis vernicosus</i>                             |
| <b>α-copaene</b>                                          | 14.24      | 1382      | 119 (100), 105 (98), 161 (79), 93 (48), 91 (45), 41 (30), 92 (27), 81 (24), 120 (22), 77 (21), 204     |                    | <i>Hamatocaulis vernicosus</i> , <i>Sphagnum flexuosum</i> |
| Unknown 4                                                 | 14.37      | 1392      | 161 (100), 41 (54), 105 (46), 55 (41), 57 (37), 91 (34), 81 (27), 79 (24), 67 (23), 120 (23), 204      | sesquiterpene      | <i>Hamatocaulis vernicosus</i> , <i>Sphagnum flexuosum</i> |
| Unknown 5                                                 | 14.76      | 1424      | 105 (100), 161 (76), 91 (63), 119 (59), 107 (51), 189 (45), 93 (42), 204 (41), 79 (39), 41 (38)        | sesquiterpene      | <i>Hamatocaulis vernicosus</i>                             |
| <b>(Z)-β-farnesene</b>                                    | 14.96      | 1440      | 69 (100), 41 (67), 93 (54), 91 (38), 79 (34), 55 (31), 77 (30), 92 (29), 161 (28), 120 (26), 204       |                    | <i>Hamatocaulis vernicosus</i>                             |
| <b>(E)-β-farnesene</b>                                    | 15.07      | 1449      | 69 (100), 41 (91), 93 (58), 91 (35), 105 (33), 55 (29), 79 (29), 133 (28), 67 (28), 161 (26), 204      |                    | <i>Hamatocaulis vernicosus</i>                             |
| Unknown 6                                                 | 15.21      | 1461      | 119 (100), 121 (87), 93 (70), 79 (56), 91 (45), 189 (42), 105 (41), 41 (40), 81 (37), 77 (33), 204     | sesquiterpene      | <i>Hamatocaulis vernicosus</i>                             |
| Unknown 7                                                 | 15.28      | 1467      | 43 (100), 119 (94), 177 (88), 149 (77), 93 (69), 91 (68), 121 (64), 105 (57), 77 (42), 79 (40), 204    | sesquiterpene      | <i>Hamatocaulis vernicosus</i>                             |
| Unknown 8                                                 | 15.37      | 1475      | 119 (100), 121 (68), 105 (62), 93 (59), 91 (58), 79 (49), 41 (48), 81 (42), 107 (38), 189 (37), 204    | sesquiterpene      | <i>Hamatocaulis vernicosus</i>                             |
| Unknown 9                                                 | 15.60      | 1493      | 161 (100), 105 (56), 119 (44), 91 (43), 41 (31), 43 (24), 81 (21), 55 (19), 93 (18), 79 (16), 204      | sesquiterpene      | <i>Hamatocaulis vernicosus</i>                             |
| Unknown 10                                                | 15.83      | 1512      | 161 (100), 43 (64), 105 (62), 119 (50), 91 (46), 41 (40), 81 (37), 93 (37), 55 (31), 79 (31), 204      | sesquiterpene      | <i>Hamatocaulis vernicosus</i>                             |
| Unknown 11                                                | 15.95      | 1523      | 105(100), 43 (99), 220 (76), 91 (76), 106 (70), 81 (69), 41 (54), 93 (50), 147 (47), 137 (46)          |                    | <i>Hamatocaulis vernicosus</i>                             |
| Unknown 12                                                | 16.07      | 1534      | 108 (100), 126 (99), 43 (95), 81 (60), 82 (47), 41 (47), 55 (46), 109 (39), 67 (37), 83 (35)           |                    | <i>Hamatocaulis vernicosus</i>                             |
| Unknown 13                                                | 16.35      | 1558      | 55 (100), 41 (96), 137 (82), 109 (80), 81 (77), 43 (72), 207 (67), 95 (61), 149 (51), 107 (49)         |                    | <i>Hamatocaulis vernicosus</i>                             |
| Unknown 14                                                | 16.64      | 1583      | 161 (100), 105 (59), 207 (59), 43 (54), 91 (38), 119 (37), 41 (30), 81 (28), 93 (19), 55 (18)          |                    | <i>Hamatocaulis vernicosus</i>                             |
| Unknown 15                                                | 17.02      | 1617      | 161 (100), 59 (72), 81 (59), 93 (49), 204 (42), 79 (42), 119 (41), 91 (39), 105 (39), 41 (34)          |                    | <i>Hamatocaulis vernicosus</i>                             |
| Unknown 16                                                | 19.31      | 1835      | 161 (100), 91 (22), 105 (20), 41 (20), 119 (15), 133 (14), 107 (14), 93 (13), 162 (13), 147 (12)       |                    | <i>Hamatocaulis vernicosus</i>                             |
| <b>Rimuene</b>                                            | 20.30      | 1937      | 257 (100), 80 (58), 91 (42), 93 (42), 81 (42), 121 (40), 55 (39), 41 (38), 79 (39), 105 (37), 272      | diterpene          | <i>Hamatocaulis vernicosus</i>                             |
| Unknown 17                                                | 20.64      | 1972      | 161 (100), 41 (45), 82 (40), 55 (34), 105 (32), 69 (28), 93 (28), 91 (27), 121 (24), 43 (23)           |                    | <i>Hamatocaulis vernicosus</i>                             |
| Unknown 18                                                | 21.33      | 2047      | 91 (100), 41 (78), 105 (77), 55 (61), 69 (60), 79 (59), 81 (59), 133 (58), 95 (54), 123 (51)           |                    | <i>Hamatocaulis vernicosus</i>                             |
| <b>α-pinene</b>                                           | 7.89       | 941       | 93 (100), 91 (43), 92 (37), 77 (32), 79 (25), 41 (18), 105 (15), 121 (13), 94 (11), 80 (11), 136       |                    | <i>Sphagnum flexuosum</i>                                  |
| <b>β-myrcene</b>                                          | 8.66       | 988       | 93 (100), 41 (93), 69 (71), 91 (23), 79 (17), 77 (15), 53 (14), 67 (13), 92 (11), 94 (10), 136         |                    | <i>Sphagnum flexuosum</i>                                  |
| <b>(E)-ocimene</b>                                        | 9.33       | 1032      | 93 (100), 91 (45), 92 (40), 79 (36), 77 (31), 41 (24), 106 (16), 80 (16), 55 (15), 121 (11), 136       |                    | <i>Sphagnum flexuosum</i>                                  |
| <b>(+)-cyclosativene</b>                                  | 14.15      | 1375      | 105 (100), 91 (72), 119 (71), 161 (71), 94 (66), 120 (50), 107 (49), 93 (47), 41 (43), 133 (33), 204   |                    | <i>Sphagnum flexuosum</i>                                  |
| <b>(±)-geosmin</b>                                        | 14.42      | 1395      | 112 (100), 55 (23), 41 (23), 111 (21), 43 (18), 108 (18), 125 (14), 93 (13), 126 (12), 97 (12), 182    |                    | <i>Sphagnum flexuosum</i>                                  |
| <b>(+)-sativene</b>                                       | 14.50      | 1401      | 108 (100), 91 (87), 161 (78), 105 (76), 93 (58), 119 (57), 147 (48), 79 (44), 133 (44), 41 (43), 204   |                    | <i>Sphagnum flexuosum</i>                                  |
| Unknown 19                                                | 14.75      | 1423      | 161 (100), 119 (53), 189 (50), 105 (49), 204 (35), 91 (35), 162 (33), 147 (28), 133 (27), 41 (25)      | sesquiterpene      | <i>Sphagnum flexuosum</i>                                  |
| Unknown 20                                                | 14.89      | 1434      | 147 (100), 105 (94), 91 (53), 93 (43), 119 (41), 107 (33), 41 (30), 190 (30), 79 (30), 175 (29)        |                    | <i>Sphagnum flexuosum</i>                                  |
| Unknown 21                                                | 15.19      | 1460      | 175 (100), 105 (33), 91 (31), 119 (31), 93 (23), 121 (23), 41 (23), 190 (21), 133 (20), 95 (19)        |                    | <i>Sphagnum flexuosum</i>                                  |
| Unknown 22                                                | 15.41      | 1477      | 43 (100), 137 (92), 109 (50), 93 (49), 161 (47), 41 (43), 81 (43), 121 (41), 105 (39), 95 (38), 222    |                    | <i>Sphagnum flexuosum</i>                                  |
| Unknown 23                                                | 15.65      | 1496      | 121 (100), 93 (84), 105 (81), 107 (55), 91 (54), 41 (46), 79 (43), 119 (38), 161 (36), 94 (34), 204    | sesquiterpene      | <i>Sphagnum flexuosum</i>                                  |
| Unknown 24                                                | 15.74      | 1504      | 173 (100), 188 (16), 174 (14), 128 (12), 143 (9), 129 (9), 158 (9), 115 (9), 145 (8), 141 (8)          |                    | <i>Sphagnum flexuosum</i>                                  |
| <b>(-)-calamenene</b>                                     | 15.85      | 1514      | 159 (100), 160 (13), 128 (13), 129 (13), 131 (10), 144 (9), 202 (8), 115 (8), 143 (6), 105 (6)         |                    | <i>Sphagnum flexuosum</i>                                  |
| Unknown 25                                                | 15.90      | 1519      | 161 (100), 119 (76), 105 (70), 134 (68), 91 (50), 204 (40), 41 (33), 81 (30), 133 (23), 162 (23)       | sesquiterpene      | <i>Sphagnum flexuosum</i>                                  |
| Unknown 26                                                | 16.44      | 1566      | 43 (100), 121 (86), 109 (81), 175 (56), 105 (55), 93 (54), 190 (49), 107 (44), 91 (41), 108 (39)       |                    | <i>Sphagnum flexuosum</i>                                  |
| Unkown 27                                                 | 16.51      | 1572      | 43 (100), 91 (94), 119 (82), 159 (80), 205 (78), 131 (64), 41 (54), 145 (50), 105 (46), 117 (46)       | sesquiterpenoid    | <i>Sphagnum flexuosum</i>                                  |
| unknown 28                                                | 16.57      | 1577      | 43 (100), 91 (63), 41 (57), 79 (48), 105 (45), 81 (40), 159 (40), 107 (39), 96 (38), 69 (36), 220      | sesquiterpenoid    | <i>Sphagnum flexuosum</i>                                  |
| Unknown 29                                                | 16.61      | 1581      | 43 (100), 41 (65), 105 (65), 107 (61), 93 (55), 91 (55), 69 (48), 109 (47), 55 (45), 81 (44), 220, 222 | sesquiterpenoid    | <i>Sphagnum flexuosum</i>                                  |
| Unkown 30                                                 | 16.70      | 1588      | 43 (100), 107 (92), 41 (75), 109 (73), 93 (70), 105 (64), 81 (63), 69 (62), 91 (59), 161 (54), 222     | sesquiterpenoid    | <i>Sphagnum flexuosum</i>                                  |
| Unknown 31                                                | 16.76      | 1593      | 109 (100), 43 (86), 136 (76), 121 (64), 93 (51), 147 (47), 105 (45), 175 (42), 91 (41), 41 (35), 208   |                    | <i>Sphagnum flexuosum</i>                                  |
| Unknown 32                                                | 17.67      | 1676      | 95 (100), 107 (40), 41 (25), 123 (21), 55 (21), 121 (21), 91 (20), 93 (18), 81 (16), 79 (15), 220      |                    | <i>Sphagnum flexuosum</i>                                  |
| Unknown 33                                                | 18.26      | 1732      | 41 (100), 91 (85), 105 (71), 67 (71), 55 (67), 79 (64), 93 (58), 81 (57), 95 (55), 43 (52)             |                    | <i>Sphagnum flexuosum</i>                                  |
| Unknown 34                                                | 20.83      | 1992      | 95 (100), 107 (89), 191 (43), 121 (38), 81 (36), 55 (31), 79 (30), 41 (29), 93 (29), 91 (27)           |                    | <i>Sphagnum flexuosum</i>                                  |
| <b>Manoyl oxide</b>                                       | 21.06      | 2017      | 43 (100), 55 (86), 81 (86), 95 (69), 67 (65), 257 (65), 41 (64), 69 (60), 275 (54), 137 (51), 290      |                    | <i>Sphagnum flexuosum</i>                                  |
| Unknown 35                                                | 21.99      | 2121      | 95 (100), 107 (34), 55 (17), 121 (15), 191 (15), 41 (13), 93 (12), 91 (12), 81 (10), 79 (10)           |                    | <i>Sphagnum flexuosum</i>                                  |

Tentative identification, mass spectrum and KI match with authentic standard; Speculative identification, strong match in commercial library, no standard available; Unknown compound, no satisfactory match in commercial library
